# Supplementary material for: Fully integrated design of a stretchable kirigami-inspired micro-sized zinc–sulfur battery
Source: Royal Society of Chemistry journal article supplement (doi:10.1039/d2ta08544e), 2023-01-01
Supplement: d2ta08544e1.pdf [file d2ta08544e1.pdf]

## Fully integrated design of a stretchable kirigami-inspired micro-sized zinc-sulfur battery

Ahmad Amiri <sup>a</sup>, Kian Bashandeh <sup>a</sup>, Ronald Sellers <sup>a</sup>, Louis Vaught <sup>a</sup>, Mohammad Naraghi <sup>b</sup>,  
and Andreas A. Polycarpou <sup>a,\*</sup>

<sup>a</sup> J. Mike Walker '66 Mechanical Engineering Department, Texas A&M University, College  
Station, TX, USA

<sup>b</sup> Department of Aerospace Engineering, Texas A&M University, College Station, Texas  
77843, USA

\* E-mail: [apolycarpou@tamu.edu](mailto:apolycarpou@tamu.edu)

### Mechanical and electrochemical characterization

An Instron 5543 single column table top tensile tester with 1 kN load cell was utilized to measure the mechanical properties of the stretchable kirigami-inspired Zn-S battery. All the electrochemical tests were conducted by a CH Instrument 660E Bipotentiostat. For non-linear discharge curves, specific capacitance was calculated by equation S1. The capacitance ( $C_{sp}$ ), capacity ( $Q$ ), and efficiency ( $\eta$ ) were obtained by applying Eqs. (S1), (S2), and (S3).

$$C_{sp} = \frac{2 i \cdot A \cdot t_d}{m_{act} \cdot \Delta V^2} \quad (S1)$$

$$Q = t_d(s) \frac{i}{3.6 m_{act}} \quad (S2)$$

$$\text{Efficiency} = \frac{t_d}{t_c} \times 100 \quad (S3)$$

The energy density ( $E$ ) and power density ( $P$ ) were respectively calculated by questions S4 and S5 <sup>[1]</sup>.

$$E = \left( \frac{C_{sp}}{7.2} \right) (\Delta V)^2 \text{ (mWh/g)} \quad (S4)$$

$$P = 3600 \cdot E / \Delta t \text{ (mW/g)} \quad (S5)$$

In the equations,  $i$  is the current,  $m_{act}$  is the cumulative masses of the anode and cathode electrodes,  $t_d$  is the discharge time,  $t_c$  is the charge time,  $\Delta V$  is the scanning potential window and

A is the electrode surface area. Energy and power densities were calculated based on the total mass of the cathode material.

## Tables

*Table S1. Discharge and charge reactions in the stretchable Zn-S battery*

|                     |                                                                                                                                                                                                                                                              |
|---------------------|--------------------------------------------------------------------------------------------------------------------------------------------------------------------------------------------------------------------------------------------------------------|
| Discharge Reactions | $S + Zn^{2+} + 2e^- \rightarrow ZnS$<br>$S + Zn^{2+} + I_2 + 4e^- \rightarrow ZnS + 2I^-$<br>$I^- + I_2 \rightarrow I_3^-$                                                                                                                                   |
| Charge Reactions    | $ZnS \rightarrow S + Zn^{2+} + 2e^-$<br>$2ZnS + 4H_2O \rightarrow S + 2Zn^{2+} + SO_4^{2-} + 8H^+ + 10e^-$<br>$ZnS + I_3^- \rightarrow S + Zn^{2+} + 1.5 I_2 + 3e^-$<br>$2ZnS + 4H_2O + I_3^- \rightarrow S + 2Zn^{2+} + SO_4^{2-} + 1.5 I_2 + 8H^+ + 11e^-$ |

*Table S2. Nitrogen adsorption (BET) results of porous CNFs*

|                        | BET surface area<br>m <sup>2</sup> /g | Average pore<br>diameter (nm) | Total pore volume<br>cm <sup>3</sup> /g |
|------------------------|---------------------------------------|-------------------------------|-----------------------------------------|
| KOH-treated AC<br>(AC) | 1241.634                              | 2.38                          | 0.7391                                  |
| AC-S                   | 2.948                                 | 13.40                         | 0.009876                                |
| As-received AC         | 467.55                                | 2.31                          | 0.27                                    |

*Table S3. Nitrogen adsorption (BET) results of porous CNFs*

| Energy storage type                                             | Configuration | Stretchability<br>[%] | Gravimetric, areal and<br>volumetric energy density | Reference |
|-----------------------------------------------------------------|---------------|-----------------------|-----------------------------------------------------|-----------|
| Crumpled Graphene<br>Supercapacitor                             | 2D planar     | 140                   | –                                                   | [2]       |
| Graphene<br>Supercapacitor                                      | 3D-Textile    | 140                   | –                                                   | [3]       |
| Carbon nanotubes –<br>fabric Supercapacitor                     | 3D -Textile   | 220                   | 20 Wh/kg                                            | [4]       |
| Manganese dioxide-<br>Carbon nanotubes<br>Supercapacitor        | 3D -Textile   | 220                   | 2.6 ×10 <sup>-3</sup> mWh/cm <sup>2</sup>           | [5]       |
| Polypyrrole-fabric<br>Supercapacitor                            | 3D -Textile   | 200                   | 11.1 Wh/kg                                          | [6]       |
| Polypyrrole /reduced<br>graphene oxide fabric<br>Supercapacitor | 3D -Textile   | 150                   | 2.53 Wh/kg                                          | [7]       |
| Manganese<br>dioxide nanowires<br>Supercapacitor                | 3D - Kirigami | 600                   | 21.07×10 <sup>-3</sup> mWh/cm <sup>2</sup>          | [8]       |

|                                                               |              |       |                                                                                                        |            |
|---------------------------------------------------------------|--------------|-------|--------------------------------------------------------------------------------------------------------|------------|
| Carbon nanotubes Supercapacitor                               | 3D - Textile | 130   | 20 Wh/kg                                                                                               | [9]        |
| Polypyrrole-Carbon nanotubes Supercapacitor                   | 3D -Textile  | 180   | 61.3 $\mu\text{Wh}/\text{cm}^2$                                                                        | [10]       |
| Carbon nanotubes Supercapacitor                               | 3D -Textile  | 150   | –                                                                                                      | [11]       |
| Graphite-cellular paper Supercapacitor                        | 3D -Origami  | 130   | –                                                                                                      | [12]       |
| Graphene-decorated Metallic textile Supercapacitor            | 3D -Textile  | 290   | $6.1 \times 10^{-3}$ Wh/ $\text{cm}^3$                                                                 | [13]       |
| Graphene Supercapacitor                                       | 3D -Kirigami | 382.5 | –                                                                                                      | [14]       |
| Polypyrrole-Manganese dioxide-Carbon nanotubes Supercapacitor | 3D -Textile  | 121   | 31.1 Wh/kg                                                                                             | [15]       |
| Zn-MnO <sub>2</sub>                                           | Fiber-like   | 300   | 447 mWh g <sup>-1</sup> (98.5 % retention after 500 cycles)                                            | [16]       |
| Zn-Ag                                                         | 2D planar    | 100   | 3.93 mWh cm <sup>-2</sup> (140 % after 30 cycles at 100 % strain)                                      | [17]       |
| Li-ion Batteries                                              | Origami      | 1300  | 0.53 mWh cm <sup>-2</sup>                                                                              | [18]       |
| Li-ion Batteries                                              | 2D planar    | 50    | 8.14 mWh cm <sup>-2</sup> (85 % after 60 cycles)                                                       | [19]       |
| Li-ion Batteries                                              | Fiber-like   | 600   | 201 mWh g <sup>-1</sup> (90 %, after 50 cycles)                                                        | [20]       |
| Li-ion Batteries                                              | Fiber-like   | 100   | 345 mWh g <sup>-1</sup> (84 % after 200 cycles)                                                        | [21]       |
| Li-ion Batteries                                              | Fiber-like   | 100   | 231 mWh g <sup>-1</sup> (92.1 % after 100 cycles)                                                      | [22]       |
| Li-air                                                        | Serpentine   | 100   | 2540 Wh kg <sup>-1</sup>                                                                               | [23]       |
| Al-air                                                        | Fiber-like   | 30    | 935 mA h g <sup>-1</sup>                                                                               | [24]       |
| Na-ion battery                                                | 3D -Textile  | 50    | 278 mWh g <sup>-1</sup> (85 % after 60 cycles)                                                         | [25]       |
| Zinc-sulfur battery                                           | Kirigami     | 200   | 184.8 mWh/g (19.6 % increase after 10,000 stretch/release cycles under 200% under 200% tensile strain) | This study |
| Zinc-sulfur battery                                           | Kirigami     | 200   | 184.8 mWh/g (6.3 % drop after 10,000 stretch/bending cycles of 200% strain and 180° bending angle)     | This study |

*Table S4. AC impedance equivalent circuit fitting parameters*

|                                       | <b>R<sub>s</sub> (Ω)</b> | <b>R<sub>i</sub></b> | <b>R<sub>ct</sub></b> | <b>W</b> |
|---------------------------------------|--------------------------|----------------------|-----------------------|----------|
| 0% strain and 1 <sup>st</sup> cycle   | 7.28                     | 6.27                 | 12.81                 | 0.03     |
| 50% strain and 1 <sup>st</sup> cycle  | 7.12                     | 5.80                 | 11.55                 | 0.03     |
| 100% strain and 1 <sup>st</sup> cycle | 7.86                     | 5.39                 | 9.7                   | 0.03     |

|                                          |       |       |       |      |
|------------------------------------------|-------|-------|-------|------|
| 150% strain and 1 <sup>st</sup> cycle    | 6.71  | 5.15  | 9.80  | 0.03 |
| 200% strain and 1 <sup>st</sup> cycle    | 6.09  | 2.64  | 6.02  | 0.03 |
| 0 % strain and 800 <sup>th</sup> cycle   | 14.16 | 10.15 | 23.32 | 0.01 |
| 200 % strain and 800 <sup>th</sup> cycle | 13.88 | 9.52  | 18.63 | 0.01 |

Table S5. AC impedance equivalent circuit fitting parameters

|                                               | $R_s$ ( $\Omega$ ) | $R_i$ | $R_{ct}$ | $W$  |
|-----------------------------------------------|--------------------|-------|----------|------|
| 0% strain and 1 <sup>st</sup> cycle at -25 °C | 22.2               | 24.39 | 13.46    | 0.03 |
| 0% strain and 1 <sup>st</sup> cycle at -25 °C | 23.24              | 23.27 | 13.84    | 0.03 |

## Figures

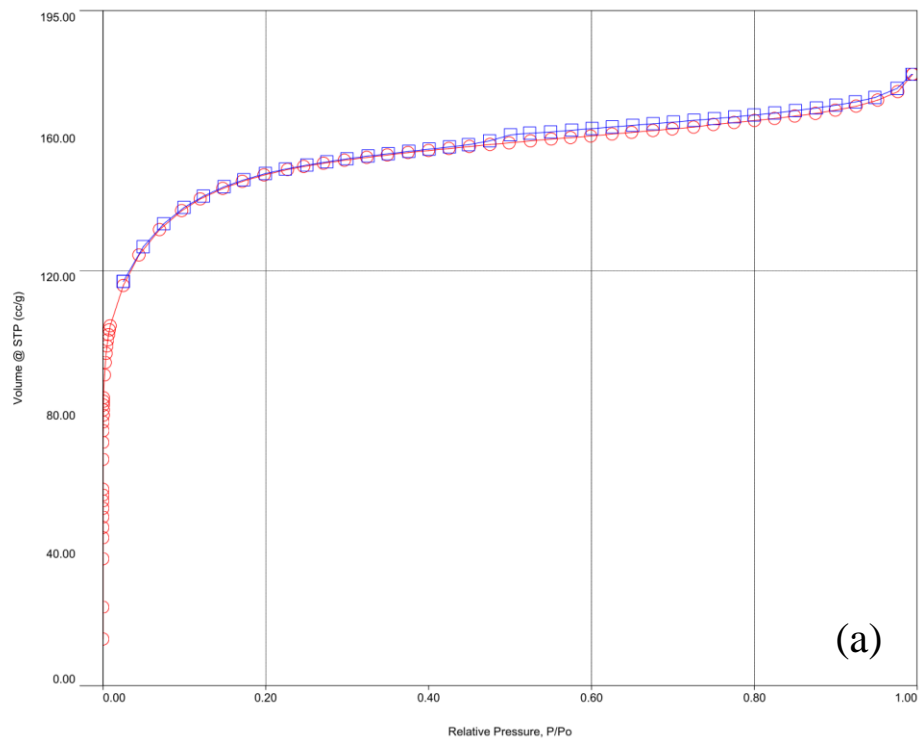

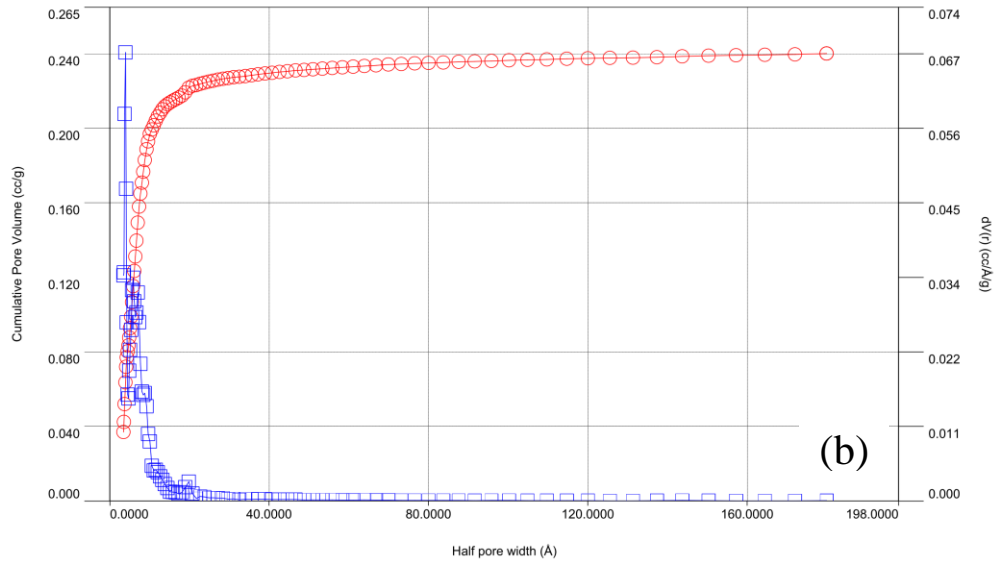

Fig. S1. (a) Adsorption-desorption isotherms and (b) distribution of pore size of as-received AC.

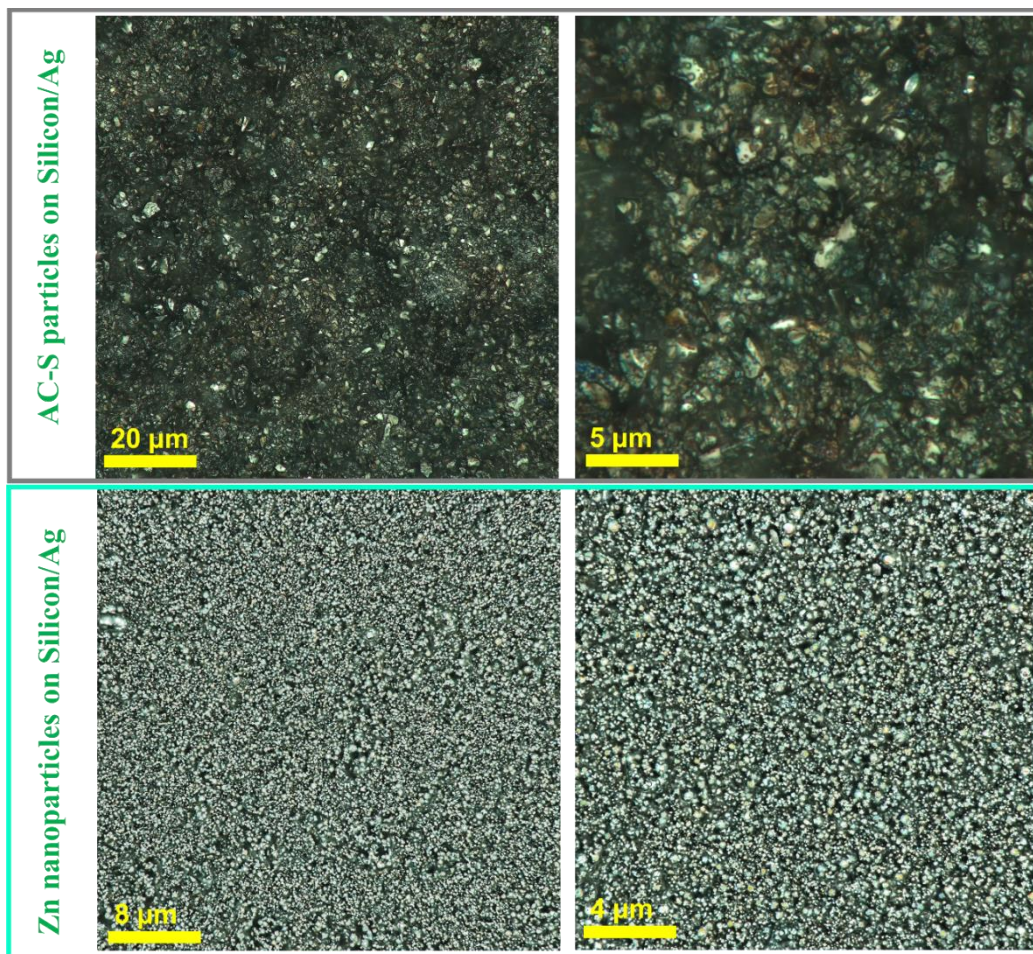

Fig. S2. The optical images of AC-S and zinc nanoparticles distributed on the current collector.

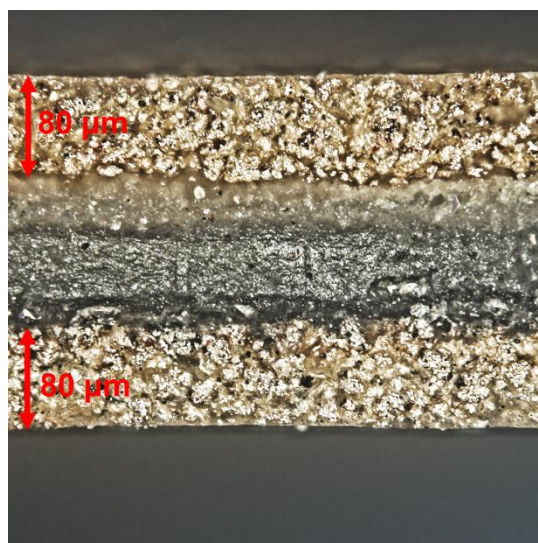

Fig. S3. The optical images of kirigami- inspired Zn-S cell. The thin film of cured silver-filled silicone adhesive possessed an average thickness of  $80 \pm 20 \mu\text{m}$ .

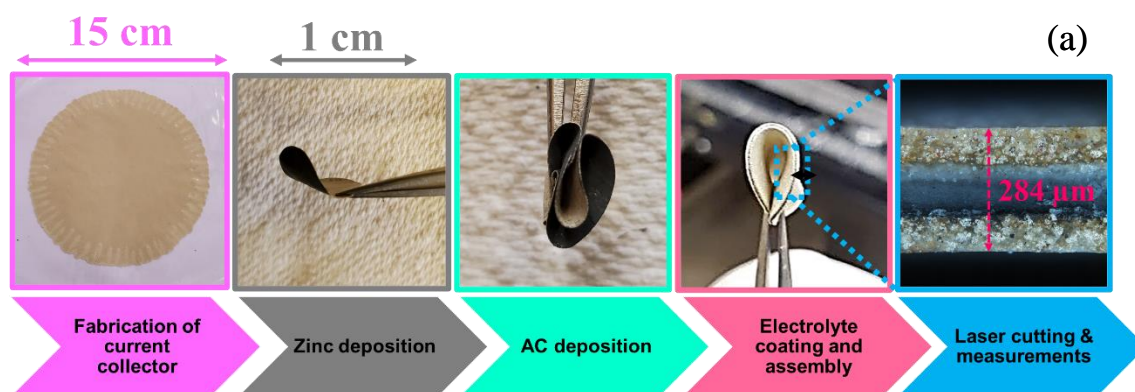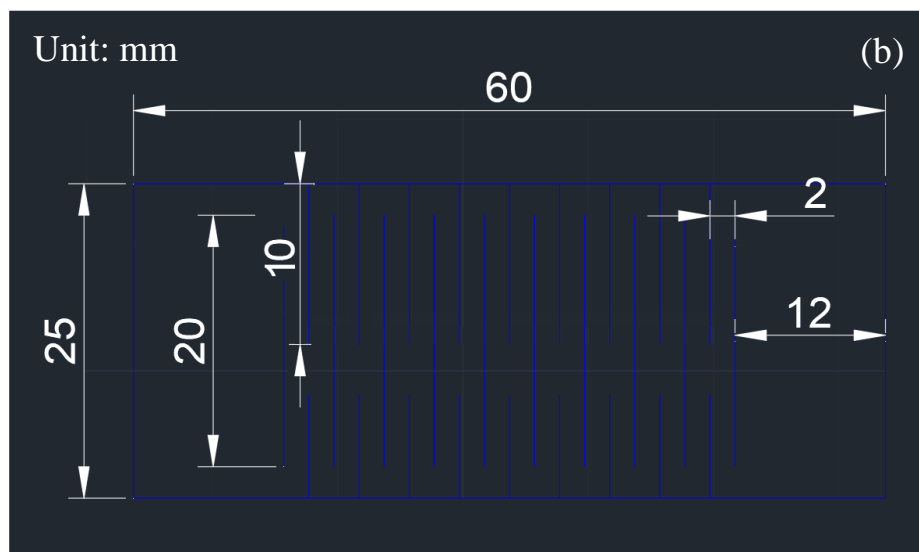

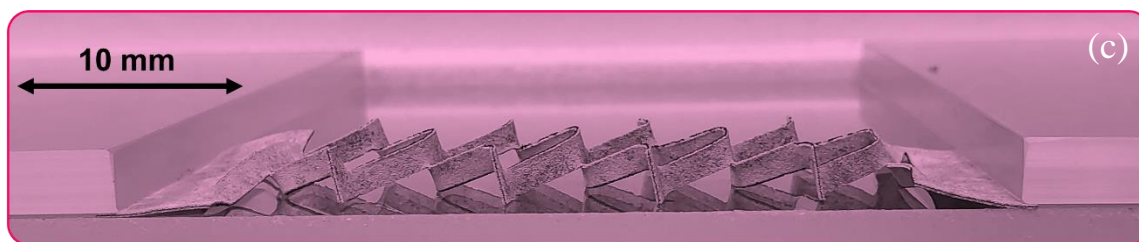

Fig. S4. (a) The photographs of the stretchable kirigami-inspired Zn-S battery in different stages of fabrication. (b) Dimensions and patterns for laser cutting. (c) 3D structure of the kirigami-inspired Zn-S battery.

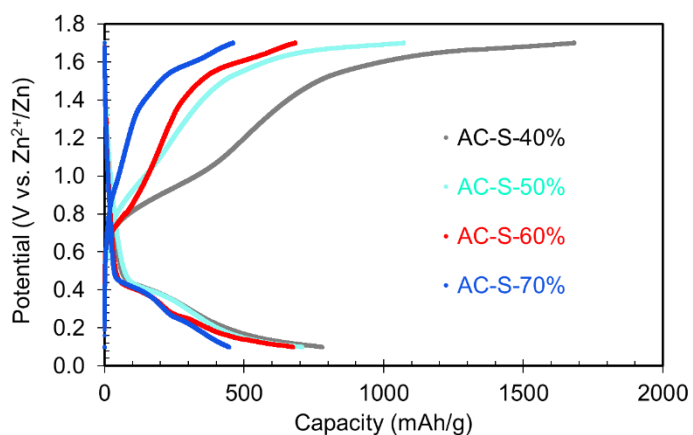

Fig. S5. Charge and discharge profiles of Zn-S battery for samples with different sulfur contents at 0.25 A/g.

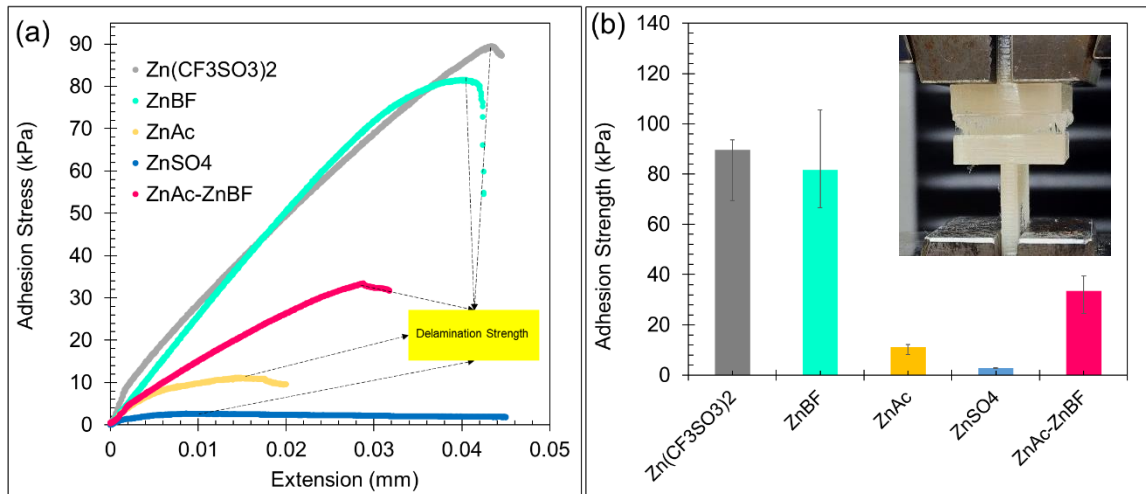

Fig. S6. (a) Typical stress–extension plots and (b) adhesion strength of different zinc salt-containing hydrogels.

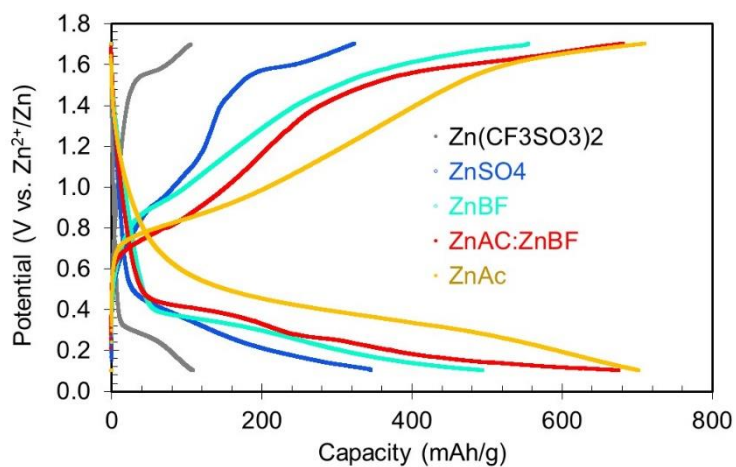

Fig. S7. Charge and discharge profiles of Zn-S battery in the presence of different electrolytes at 0.25 A/g.



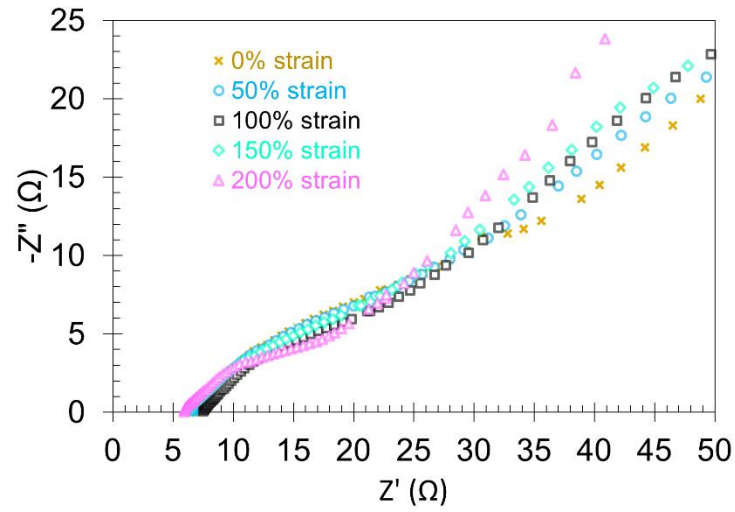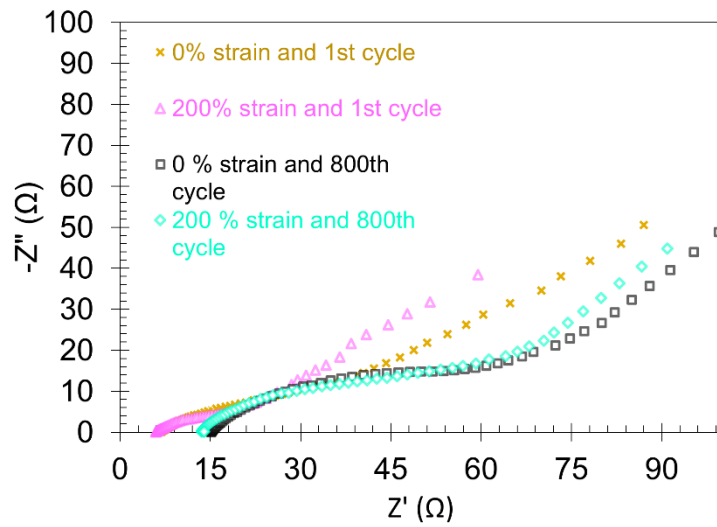

Fig. S8. Nyquist plots of kirigami-inspired Zn-S battery as a function of (a) strain and (b) cycle.

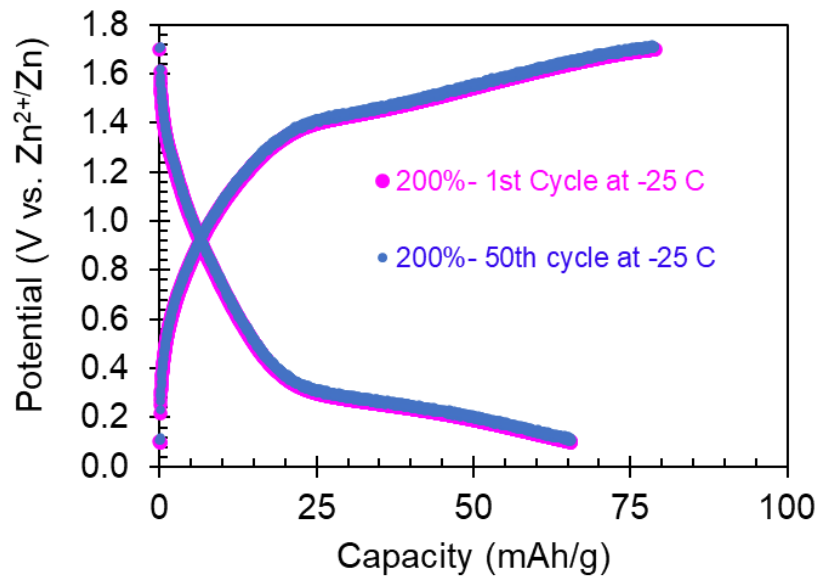

Fig. S9. Charge and discharge profiles of the kirigami-inspired Zn-S battery subjected to 1 and 50 stretching cycles under 200% tensile strain at -25 °C.

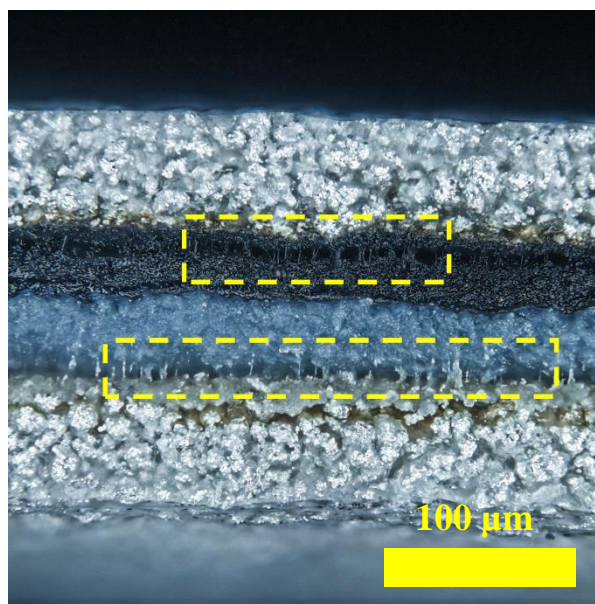

Fig. S10. The optical image of the partial delamination between electrodes and current collector at -25 °C. We observed a handful of delaminated sites only at -25 °C.

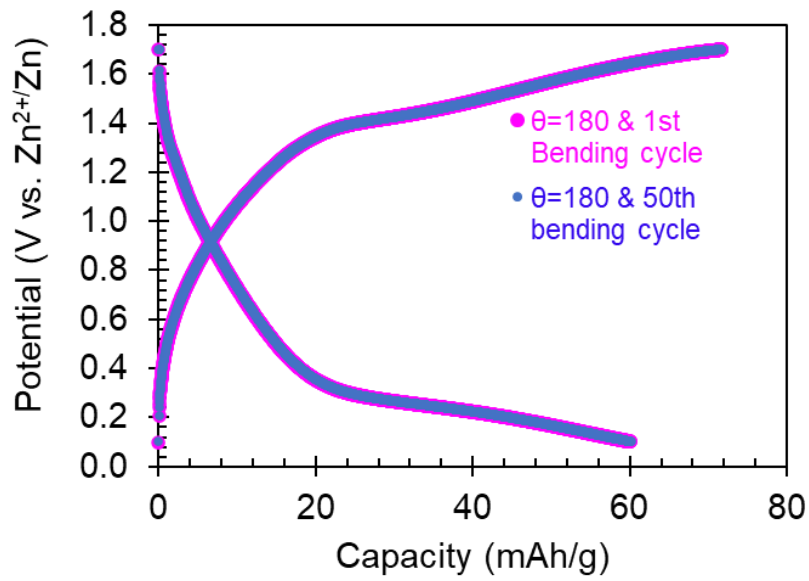

Fig. S11. Charge and discharge profiles of the kirigami-inspired Zn-S battery subjected to 1 and 50 bending cycles under 180° at -25 °C.

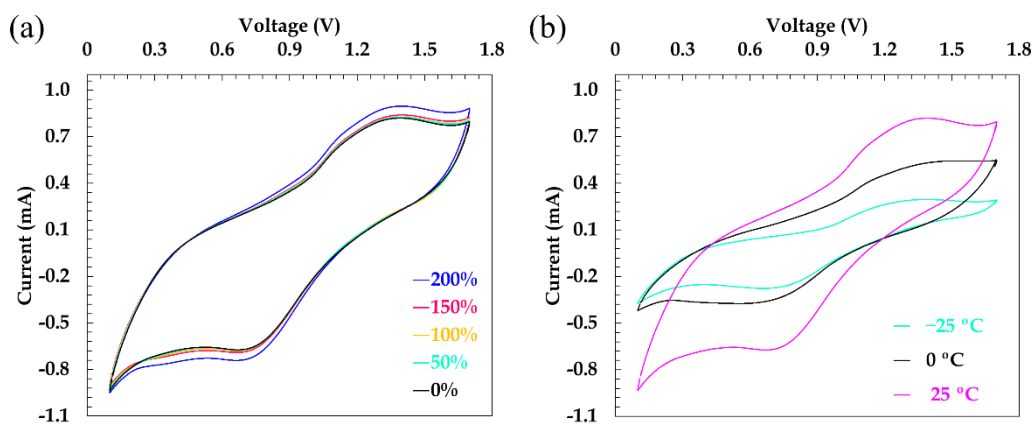

Fig. S12. CV charts of the kirigami-inspired Zn-S battery as a function of (a) tensile strain at 25 °C and 1 mV/s and (b) temperature at 1 mV/s.

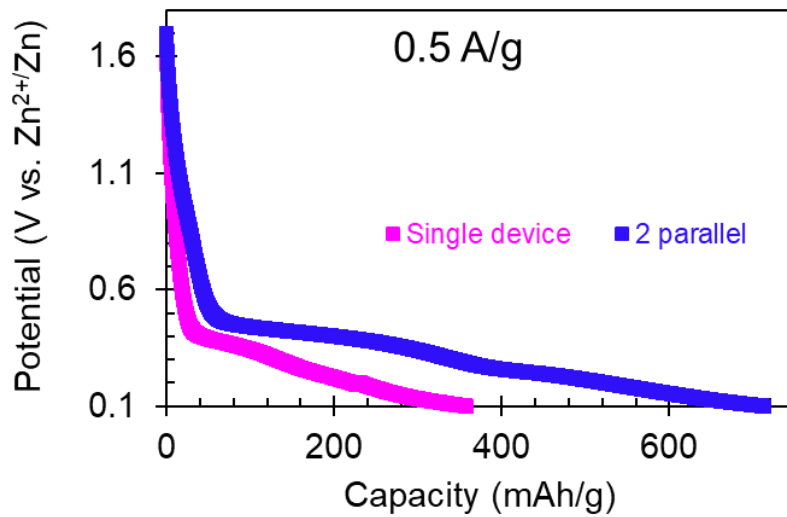

Fig. 13. Discharge curves of two Zn-S assembled in a parallel design vs. a single device at 0.5 A/g.

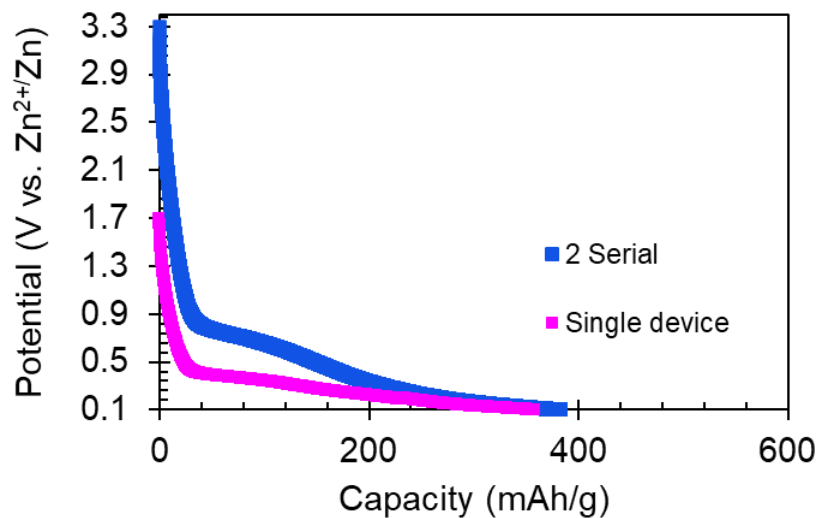

Fig. 14. Discharge curves of two Zn-S assembled in a serial design vs. a single device at 0.5 A/g.

## References

- [1] S. C. Sekhar, G. Nagaraju, J. S. Yu, Nano Energy 2017, 36, 58; Q. Meng, K. Qin, L. Ma, C. He, E. Liu, F. He, C. Shi, Q. Li, J. Li, N. Zhao, ACS applied materials & interfaces 2017, 9, 30832; G. Lee, S. K. Kang, S. M. Won, P. Gutruf, Y. R. Jeong, J. Koo, S. S. Lee, J. A. Rogers, J. S. Ha, Advanced Energy Materials 2017, 7, 1700157.

- [2] T. Chen, Y. Xue, A. K. Roy, L. Dai, ACS nano 2014, 8, 1039.
- [3] X. Zang, M. Zhu, X. Li, X. Li, Z. Zhen, J. Lao, K. Wang, F. Kang, B. Wei, H. Zhu, Nano Energy 2015, 15, 83.
- [4] L. Hu, M. Pasta, F. La Mantia, L. Cui, S. Jeong, H. D. Deshazer, J. W. Choi, S. M. Han, Y. Cui, Nano letters 2010, 10, 708.
- [5] C. Choi, S. H. Kim, H. J. Sim, J. A. Lee, A. Y. Choi, Y. T. Kim, X. Lepró, G. M. Spinks, R. H. Baughman, S. J. Kim, Scientific reports 2015, 5, 1.
- [6] B. Yue, C. Wang, X. Ding, G. G. Wallace, Electrochimica Acta 2012, 68, 18.
- [7] C. Zhao, K. Shu, C. Wang, S. Gambhir, G. G. Wallace, Electrochimica Acta 2015, 172, 12.
- [8] Z. Lv, Y. Luo, Y. Tang, J. Wei, Z. Zhu, X. Zhou, W. Li, Y. Zeng, W. Zhang, Y. Zhang, Advanced Materials 2018, 30, 1870008.
- [9] D. Kim, G. Shin, Y. J. Kang, W. Kim, J. S. Ha, Acs Nano 2013, 7, 7975.
- [10] J. Sun, Y. Huang, C. Fu, Z. Wang, Y. Huang, M. Zhu, C. Zhi, H. Hu, Nano Energy 2016, 27, 230.
- [11] Y.-H. Lee, Y. Kim, T.-I. Lee, I. Lee, J. Shin, H. S. Lee, T.-S. Kim, J. W. Choi, ACS nano 2015, 9, 12214.
- [12] I. Nam, G.-P. Kim, S. Park, J. W. Han, J. Yi, Energy & Environmental Science 2014, 7, 1095.
- [13] L. Liu, Y. Yu, C. Yan, K. Li, Z. Zheng, Nature communications 2015, 6, 1.
- [14] R. Xu, A. Hung, A. Zverev, C. Shen, L. Irie, G. Ding, M. Whitmeyer, L. Ren, B. Griffin, J. Melcher, "A Kirigami-inspired, extremely stretchable, high areal-coverage micro-supercapacitor patch", presented at *2018 IEEE Micro Electro Mechanical Systems (MEMS)*, 2018.
- [15] T. G. Yun, B. I. Hwang, D. Kim, S. Hyun, S. M. Han, ACS applied materials & interfaces 2015, 7, 9228.
- [16] H. Li, Z. Liu, G. Liang, Y. Huang, Y. Huang, M. Zhu, Z. Pei, Q. Xue, Z. Tang, Y. Wang, ACS nano 2018, 12, 3140.
- [17] R. Kumar, J. Shin, L. Yin, J. M. You, Y. S. Meng, J. Wang, Advanced Energy Materials 2017, 7, 1602096.
- [18] Z. Song, T. Ma, R. Tang, Q. Cheng, X. Wang, D. Krishnaraju, R. Panat, C. K. Chan, H. Yu, H. Jiang, Nature communications 2014, 5, 1.
- [19] W. Liu, J. Chen, Z. Chen, K. Liu, G. Zhou, Y. Sun, M. S. Song, Z. Bao, Y. Cui, Advanced Energy Materials 2017, 7, 1701076.
- [20] Y. Zhang, W. Bai, J. Ren, W. Weng, H. Lin, Z. Zhang, H. Peng, Journal of Materials Chemistry A 2014, 2, 11054.
- [21] J. Ren, Y. Zhang, W. Bai, X. Chen, Z. Zhang, X. Fang, W. Weng, Y. Wang, H. Peng, Angewandte Chemie 2014, 126, 7998.
- [22] Y. Zhang, W. Bai, X. Cheng, J. Ren, W. Weng, P. Chen, X. Fang, Z. Zhang, H. Peng, Angewandte Chemie International Edition 2014, 53, 14564.
- [23] L. Wang, Y. Zhang, J. Pan, H. Peng, Journal of Materials Chemistry A 2016, 4, 13419.
- [24] Y. Xu, Y. Zhao, J. Ren, Y. Zhang, H. Peng, Angewandte Chemie 2016, 128, 8111.
- [25] H. Li, Y. Ding, H. Ha, Y. Shi, L. Peng, X. Zhang, C. J. Ellison, G. Yu, Advanced Materials 2017, 29, 1700898.
